# Supplementary material
Source: PubMed Central journal article supplement (PMC4198107)
Supplement: bc500291r_si_001.pdf [file bc500291r_si_001.pdf]

Supplemental Material: 4T1 Exosomes Proteomic Analysis

Supplemental Table 1. Results of 4T1 Exosome Proteomic Analysis

| UniProt ID | Protein                                              | Symbol/Entrez Gene ID | Scores          | #Peptides | Subcellular Localization | Function              | XO GO mouse | XO GO human | Vesiclepedia |
|------------|------------------------------------------------------|-----------------------|-----------------|-----------|--------------------------|-----------------------|-------------|-------------|--------------|
| Q8BTM8     | Filamin-A                                            | Flna                  | 132.0 (M:132.0) | 4         | membrane                 | transporter           | Y           | Y           | Y            |
| P61982     | 14-3-3 protein gamma                                 | Ywhag                 | 114.7 (M:114.7) | 2         | membrane                 | receptor              | N           | Y           | Y            |
| P10852     | 4F2 cell-surface antigen heavy chain                 | Slc3a2                | 212.9 (M:212.9) | 4         | membrane                 | transporter           | N           | Y           | Y            |
| P51912     | Neutral amino acid transporter B(0)                  | Slc1a5                | 159.8 (M:159.8) | 3         | membrane                 | transporter           | Y           | Y           | Y            |
| P60710     | Actin, cytoplasmic 1                                 | Actb                  | 166.4 (M:166.4) | 4         | cytoplasm                | cytoskeleton          | N           | Y           | Y            |
| P97384     | Annexin A11                                          | Anxa11                | 62.1 (M:62.1)   | 2         | cytoplasm, nucleus       | scaffold              | Y           | Y           | Y            |
| P10107     | Annexin A1                                           | Anxa1                 | 222.8 (M:222.8) | 4         | membrane                 | scaffold              | Y           | Y           | Y            |
| P07356     | Annexin A2                                           | Anxa2                 | 111.4 (M:111.4) | 2         | membrane, extracellular  | scaffold              | Y           | Y           | Y            |
| P48036     | Annexin A5                                           | Anxa5                 | 399.4 (M:399.4) | 7         | extracellular            | coagulation           | Y           | Y           | Y            |
| P14824     | Annexin A6                                           | Anxa6                 | 84.1 (M:84.1)   | 2         | cytoplasm                | scaffold              | N           | Y           | Y            |
| P61205     | ADP-ribosylation factor 3                            | Arf3                  | 183.8 (M:183.8) | 3         | cytoplasm, Golgi         | enzyme (GTPase)       | N           | Y           | Y            |
| P61750     | ADP-ribosylation factor 4                            | Arf4                  | 77.5 (M:77.5)   | 2         | cytoplasm, Golgi         | enzyme (GTPase)       | N           | Y           | Y            |
| Q8VDN2     | Sodium/potassium-transporting ATPase subunit alpha-1 | Atp1a1                | 275.8 (M:275.8) | 6         | membrane                 | transporter           | N           | Y           | Y            |
| P18572     | Basigin                                              | Bsg                   | 64.3 (M:64.3)   | 2         | membrane                 | receptor              | N           | Y           | Y            |
| Q9Z1Q5     | Chloride intracellular channel protein 1             | Clic1                 | 101.9 (M:101.9) | 3         | membrane                 | transporter           | N           | Y           | Y            |
| P10126     | Elongation factor 1-alpha 1                          | Eef1a1                | 111.7 (M:111.7) | 3         | cytoplasm, nucleus       | translation regulator | N           | Y           | Y            |
| P58252     | Elongation factor 2                                  | Eef2                  | 59.4 (M:59.4)   | 2         | cytoplasm                | translation regulator | N           | Y           | Y            |
| Q9WVK4     | EH domain-containing protein 1                       | Ehd1                  | 149.1 (M:149.1) | 4         | membrane                 | membrane fusion       | N           | Y           | Y            |

Supplemental Table 1. Continued

| UniProt ID | Protein                                                 | Symbol/Entrez Gene ID | Scores          | #Peptides | Subcellular Localization     | Function              | XO GO mouse | XO GO human | Vesiclepedia |
|------------|---------------------------------------------------------|-----------------------|-----------------|-----------|------------------------------|-----------------------|-------------|-------------|--------------|
| P10404     | MLV-related proviral Env polyprotein OS=Mus musculus    | N/A                   | 70.3 (M:70.3)   | 2         | membrane                     | membrane fusion       | N           | N/A         | N/A          |
| Q03145     | Ephrin type-A receptor 2                                | Epha2                 | 96.6 (M:96.6)   | 3         | membrane                     | adhesion              | N           | N           | Y            |
| O88783     | Coagulation factor V                                    | F5                    | 64.3 (M:64.3)   | 2         | extracellular                | coagulation           | N           | N           | Y            |
| Q9WV91     | Prostaglandin F2 receptor negative regulator            | Ptgfrn                | 432.3 (M:432.3) | 7         | cytoplasm, Golgi             | inhibitor             | N           | N           | Y            |
| P08752     | Guanine nucleotide-binding protein G(i) subunit alpha-2 | Gnai2                 | 213.0 (M:213.0) | 4         | cytoplasm                    | translation regulator | N           | Y           | Y            |
| Q8CGP6     | Histone H2A type 1-H                                    | Hist1h2ah             | 106.1 (M:106.1) | 2         | nucleus                      | DNA binding           | N           | Y           | Y            |
| Q6ZWW9     | Histone H2B type 1-C/E/G                                | Hist1h2bc             | 95.0 (M:95.0)   | 2         | nucleus                      | DNA binding           | N           | Y           | Y            |
| P62806     | Histone H4                                              | Hist1h4a              | 90.5 (M:90.5)   | 2         | nucleus                      | DNA binding           | N           | Y           | Y            |
| P11499     | Heat shock protein HSP 90-beta                          | Hsp90ab1              | 214.2 (M:214.2) | 4         | cytoplasm                    | chaperone             | N           | Y           | Y            |
| P63017     | Heat shock cognate 71 kDa protein                       | Hspa8                 | 307.4 (M:307.4) | 5         | cytoplasm                    | chaperone             | Y           | Y           | Y            |
| Q62469     | Integrin alpha-2                                        | Itga2                 | 76.2 (M:76.2)   | 2         | membrane                     | adhesion              | N           | N           | Y            |
| Q62470     | Integrin alpha-3                                        | Itga3                 | 101.9 (M:101.9) | 2         | membrane                     | adhesion              | N           | Y           | Y            |
| P09055     | Integrin beta-1                                         | Itgb1                 | 358.6 (M:358.6) | 7         | membrane                     | adhesion              | N           | Y           | Y            |
| P52480     | Pyruvate kinase PKM                                     | Pkm                   | 327.1 (M:327.1) | 6         | cytoplasm, nucleus           | enzyme (metabolism)   | Y           | Y           | Y            |
| P16045     | Galectin-1                                              | Lgals1                | 87.4 (M:87.4)   | 2         | extracellular                | receptor              | N           | N           | Y            |
| P26041     | Moesin                                                  | Msn                   | 330.4 (M:330.4) | 7         | cytoplasm, membrane          | cytoskeleton          | Y           | Y           | Y            |
| P53986     | Monocarboxylate transporter 1                           | Slc16a1               | 101.9 (M:101.9) | 2         | membrane                     | transporter           | N           | Y           | Y            |
| Q9CQ65     | S-methyl-5'-thioadenosine phosphorylase                 | Mtap                  | 77.1 (M:77.1)   | 2         | cytoplasm, nucleus           | enzyme (metabolism)   | N           | Y           | Y            |
| Q9WU77     | Unconventional myosin-1c                                | Myo1c                 | 217.9 (M:217.9) | 4         | cytoplasm, nucleus, membrane | transporter           | Y           | Y           | Y            |
| Q9WU78     | Programmed cell death 6-interacting protein (Alix)      | Pdcd6ip               | 478.0 (M:478.0) | 8         | cytoplasm                    | transporter           | N           | Y           | Y            |

Supplemental Table 1. Continued

| UniProt ID | Protein                                      | Symbol/Entrez Gene ID | Scores          | #Peptides | Subcellular Localization | Function               | XO GO mouse | XO GO human | Vescilepedia |
|------------|----------------------------------------------|-----------------------|-----------------|-----------|--------------------------|------------------------|-------------|-------------|--------------|
| P17742     | Peptidyl-prolyl cis-trans isomerase A        | Ppia                  | 211.1 (M:211.1) | 4         | cytoplasm, extracellular | enzyme (isomerization) | N           | Y           | Y            |
| P35700     | Peroxiredoxin-1                              | Prdx1                 | 115.0 (M:115.0) | 2         | cytoplasm                | enzyme (peroxidase)    | N           | Y           | Y            |
| P62962     | Profilin-1                                   | Pfn1                  | 245.3 (M:245.3) | 5         | cytoplasm                | cytoskeleton           | N           | Y           | Y            |
| P61027     | Ras-related protein Rab-10                   | Rab10                 | 115.1 (M:115.1) | 2         | membrane                 | enzyme (GTPase)        | N           | Y           | Y            |
| P62821     | Ras-related protein Rab-1A                   | Rab1A                 | 75.8 (M:75.8)   | 2         | membrane                 | enzyme (GTPase)        | N           | Y           | Y            |
| Q6PHN9     | Ras-related protein Rab-35                   | Rab35                 | 96.7 (M:96.7)   | 2         | membrane                 | enzyme (GTPase)        | N           | Y           | Y            |
| P26043     | Radixin                                      | Rdx                   | 203.8 (M:203.8) | 5         | membrane, cytoplasm      | receptor               | N           | Y           | Y            |
| P62984     | Ubiquitin-60S ribosomal protein L40          | Uba52                 | 101.4 (M:101.4) | 2         | cytoplasm                | regulatory             | N           | N           | Y            |
| P10833     | Ras-related protein R-Ras                    | Rras                  | 142.1 (M:142.1) | 3         | membrane                 | enzyme (GTPase)        | N           | Y           | Y            |
| P50543     | Protein S100-A11                             | S100a11               | 77.6 (M:77.6)   | 2         | cytoplasm, nucleus       | receptor               | N           | Y           | Y            |
| O35874     | Neutral amino acid transporter A             | Slc1a4                | 73.9 (M:73.9)   | 2         | membrane                 | transporter            | N           | Y           | Y            |
| P54116     | Erythrocyte band 7 integral membrane protein | Stom                  | 111.6 (M:111.6) | 3         | membrane                 | transporter            | Y           | Y           | Y            |
| P68373     | Tubulin alpha-1C chain                       | Tuba1c                | 200.0 (M:200.0) | 4         | cytoplasm                | cytoskeleton           | N           | N           | Y            |
| P68368     | Tubulin alpha-4A chain                       | Tuba4a                | 211.0 (M:211.0) | 4         | cytoplasm                | cytoskeleton           | N           | Y           | Y            |
| P99024     | Tubulin beta-5 chain                         | Tubb5                 | 196.5 (M:196.5) | 4         | cytoplasm                | cytoskeleton           | Y           | Y           | Y            |
| P20152     | Vimentin                                     | Vim                   | 171.9 (M:171.9) | 3         | cytoplasm                | cytoskeleton           | Y           | Y           | Y            |

Supplemental Table 1. UniProt numbers were gathered from the UniProt Knowledgebase (<http://www.uniprot.org/>). Subcellular Localization, Functions, and Gene Ontology (GO) of exosomes were assembled from the UniProt website. All proteins identified were searched in Vesiclepedia (<http://microvesicles.org/>) for literary examples of their association with exosomes. One hundred micrograms of exosomes, based on total protein content, was subjected to in-solution digestion using performic acid. To separate tryptic digests, a 5-50% ACN gradient over 120 minutes on a C18 column (Michrocom, Agilent) was used. MS/MS spectra were collected by an Amazon Speed ion ETD trap equipped with CaptiveSpray nanoBooster ionization source. Data was processed using ProteinScape 3.1. Database searches were performed against all mouse entries in the Swiss Prot database using the Mascot Server using 0.6Da peptide mass tolerance and 0.5Da MS/MS tolerance allowing for 1 missed cleavage and modifications for dioxidation of Methionine and trioxidation of cysteine. Identification of proteins was considered significant if at least 2 unique peptides were used for identification.
